# Supplementary material for: Craniomandibular System and Postural Balance after 3-Day Dry Immersion
Source: PubMed Central journal article supplement (PMC4767814; doi:10.1371/journal.pone.0150052), 2016-02-25
Supplement: pone.0150052.s001.pdf [file pone.0150052.s001.pdf]

## Supporting Information

**S1 Table. Postural sway parameters before, during and after dry immersion.** Data (means  $\pm$  standard error, N = 12) for the two mandibular positions: ICP = dental intercuspidal position, RP = rest position. Days are indicated as follows: control period (BDC-3), the first day of recovery (R0), the second day of recovery period (R+1). \* $p < 0.05$ ; \*\* $p < 0.01$  compared with BDC-1 value.

| Parameter               |     | Eyes Open        |                    |                    | Eyes Closed      |                    |                  |
|-------------------------|-----|------------------|--------------------|--------------------|------------------|--------------------|------------------|
|                         |     | BDC-3            | R0                 | R+1                | BDC-3            | R0                 | R+1              |
| Path length (mm)        | ICP | 212.3 $\pm$ 16.7 | 258.9 $\pm$ 19.5*  | 233.6 $\pm$ 16.4   | 327.7 $\pm$ 22.9 | 392.6 $\pm$ 28.5*  | 347.6 $\pm$ 20.9 |
|                         | RP  | 200.4 $\pm$ 16.8 | 259.8 $\pm$ 22.8** | 238.5 $\pm$ 14.1** | 303.8 $\pm$ 26.8 | 447.9 $\pm$ 42.2** | 350.0 $\pm$ 16.5 |
| Area (mm <sup>2</sup> ) | ICP | 47.3 $\pm$ 8.1   | 65.5 $\pm$ 18.7    | 58.0 $\pm$ 13.6    | 99.2 $\pm$ 15.0  | 76.3 $\pm$ 11.6    | 76.8 $\pm$ 17.3  |
|                         | RP  | 49.0 $\pm$ 11.2  | 76.5 $\pm$ 16.9*   | 47.6 $\pm$ 5.0     | 66.5 $\pm$ 7.7   | 124.3 $\pm$ 28.1   | 72.2 $\pm$ 12.1  |
| Velocity (mm/sec)       | ICP | 7.1 $\pm$ 0.6    | 8.6 $\pm$ 0.7*     | 7.8 $\pm$ 0.5      | 10.9 $\pm$ 0.8   | 13.1 $\pm$ 1.0*    | 11.6 $\pm$ 0.7   |
|                         | RP  | 6.7 $\pm$ 0.6    | 8.7 $\pm$ 0.8**    | 8.0 $\pm$ 0.5**    | 10.1 $\pm$ 0.9   | 14.9 $\pm$ 1.4*    | 11.7 $\pm$ 0.6*  |
| LFS                     | ICP | 0.6 $\pm$ 0.04   | 0.7 $\pm$ 0.06*    | 0.6 $\pm$ 0.05*    | 0.9 $\pm$ 0.07   | 1.1 $\pm$ 0.08     | 0.9 $\pm$ 0.06   |
|                         | RP  | 0.5 $\pm$ 0.04   | 0.7 $\pm$ 0.07*    | 0.6 $\pm$ 0.04*    | 0.8 $\pm$ 0.08   | 1.3 $\pm$ 0.15*    | 0.9 $\pm$ 0.05   |
